# Supplementary material for: Direct Z-scheme α-MnO2@MnIn2S4 hierarchical photocatalysts with atomically defined junctions for improved photocatalytic activities
Source: Royal Society of Chemistry journal article supplement (doi:10.1039/d0na00848f), 2020-12-11
Supplement: d0na00848f1.pdf [file d0na00848f1.pdf]

## Supplementary Material

### Direct Z-scheme $\alpha$ - $\text{MnO}_2$ @ $\text{MnIn}_2\text{S}_4$ Hierarchical Photocatalysts with Atomically Defined Junction for Improved Photocatalytic Activities

Min Zhang<sup>1</sup>, Muhammad Arif<sup>1</sup>, Yuxiang Hua<sup>1</sup>, Bo Qiu<sup>1</sup>, Yue Mao<sup>1</sup>, Xiaoheng Liu<sup>1\*</sup>

*<sup>1</sup> Key Laboratory of Education Ministry for Soft Chemistry and Functional Materials, Nanjing University of Science and Technology, Nanjing 210094, China;*

*E-mail: xhliu@njust.edu.cn*

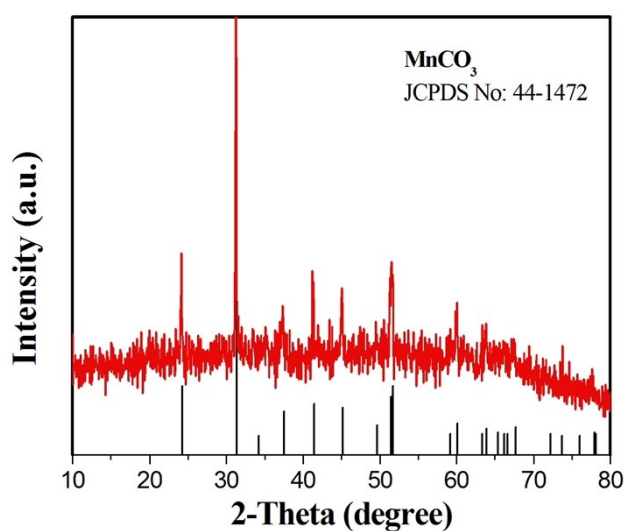

**Fig. S1.** XRD pattern of  $\text{MnCO}_3$  nanocubes.

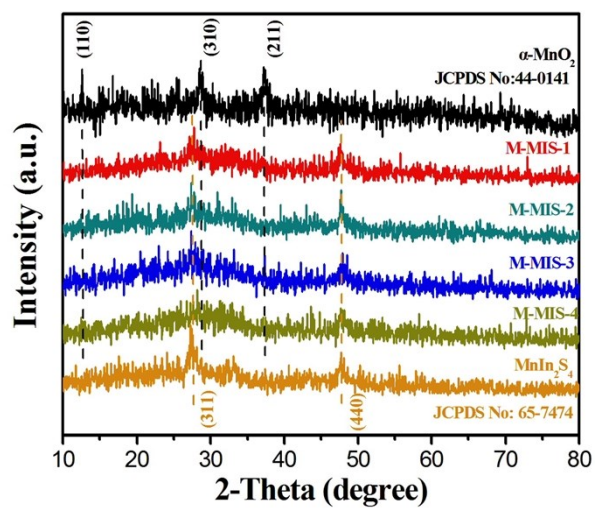

**Fig. S2.** XRD patterns of pure  $\alpha$ -MnO<sub>2</sub>, MnIn<sub>2</sub>S<sub>4</sub> and M-MIS-x (x=1, 2, 3, 4).

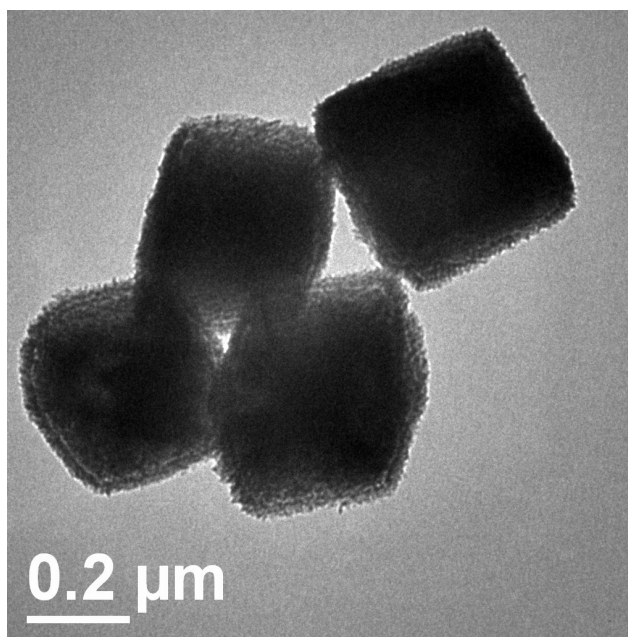

**Fig. S3.** The TEM image of  $\delta$ -MnO<sub>2</sub> precursor.

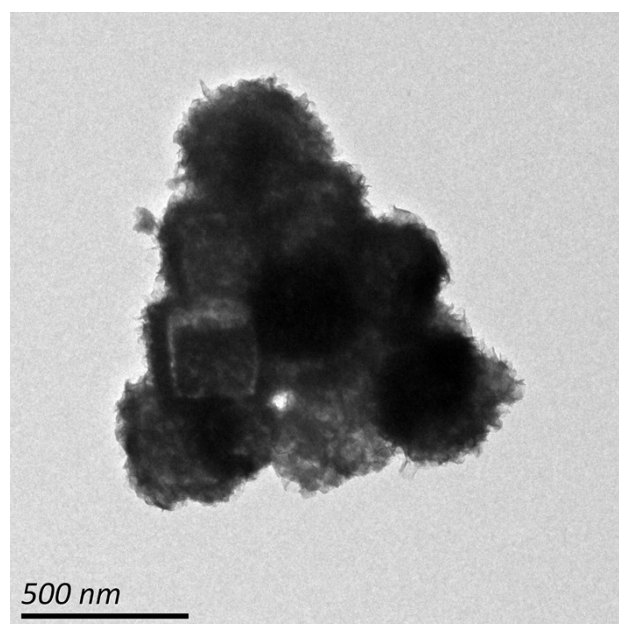

**Fig S4.** TEM images of M-MIS-2 at interface.

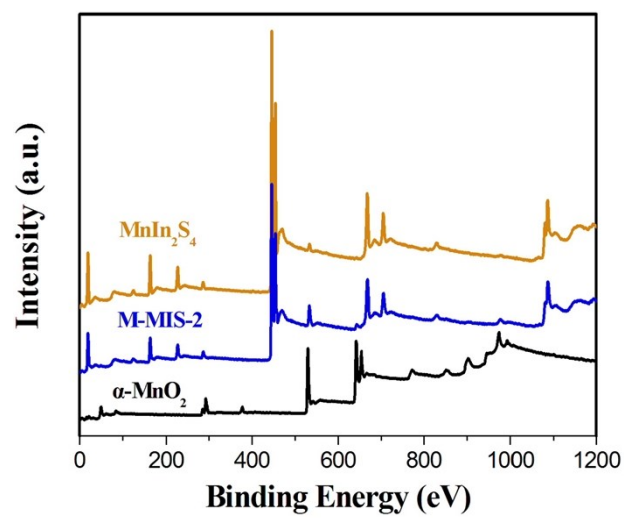

**Fig. S5.** The full-scale XPS spectra for the  $\alpha$ -MnO<sub>2</sub>@MnIn<sub>2</sub>S<sub>4</sub> (M-MIS-2) and pure  $\alpha$ -MnO<sub>2</sub>, MnIn<sub>2</sub>S<sub>4</sub>.

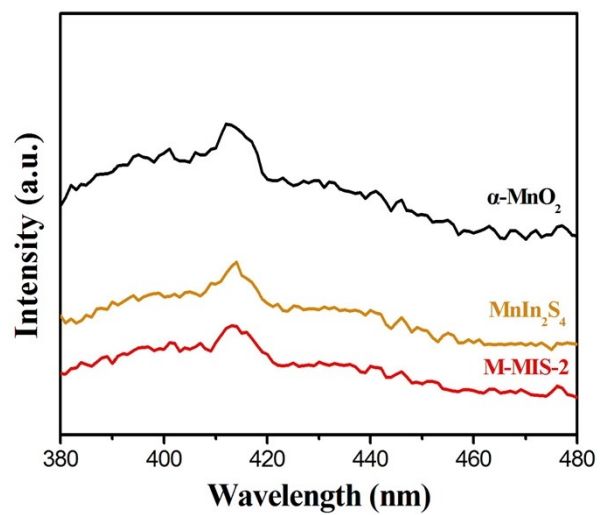

**Fig. S6.** Solid state PL emission spectra of  $\alpha$ - $\text{MnO}_2$ ,  $\text{MnIn}_2\text{S}_4$  and M-MIS-2.

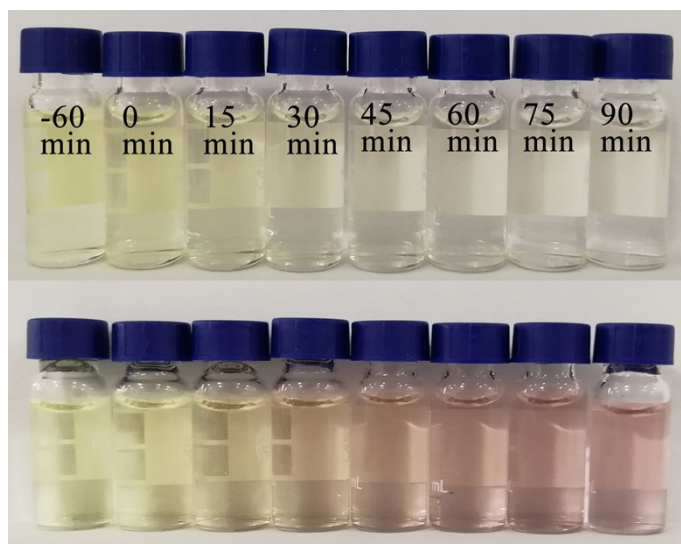

**Fig. S7.** The color variation of 4-NA during photocatalytic reaction and corresponding color change when the catalysate was oxidized used M-MIS-2 as the catalyst.

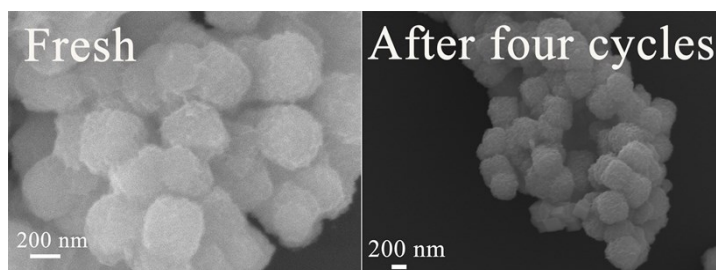

**Fig. S8.** The SEM images M-MIS-2 catalyst before and after the reaction.

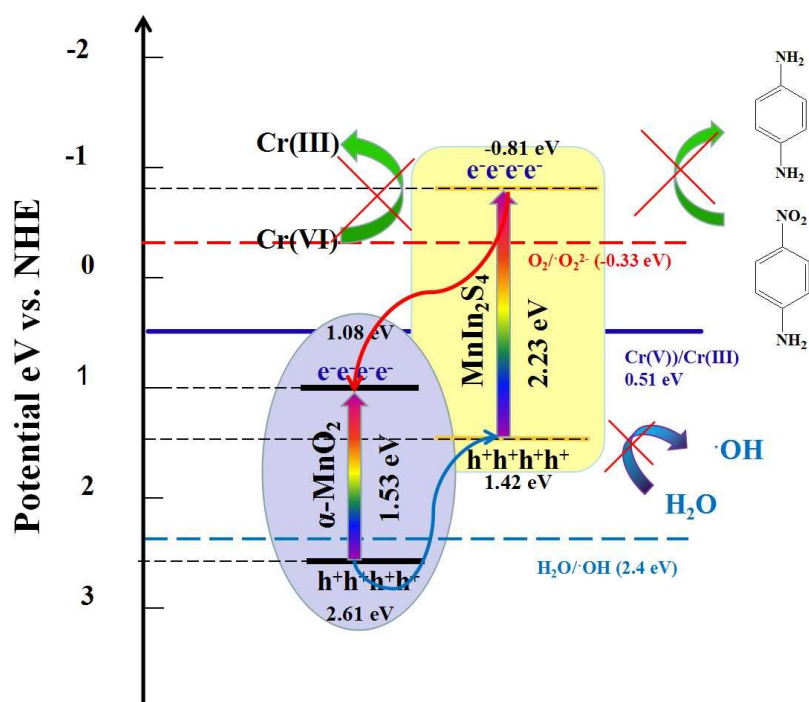

Fig S9. Type II heterojunction photocatalytic mechanism.
